# Supplementary material
Source: PubMed Central journal article supplement (PMC4523331)
Supplement: bph0172-3728-sd1.pdf [file bph0172-3728-sd1.pdf]

1 **Supplemental Figure 1.**

2

```
Hsa-miR-100      GUGUUCAAGCCUAGAUGCCCAA
                  | | | | | | | |
Human            CAATGGCAATAGGACAAAACGGGTTACTAAGA
Chimpanzee      CAATGGCAATAGGATAAAAACGGGTTACTAAGA
Mouse           CAATGGCAATAGGATAAAAACGGGTTACTAAGA
Rat             CAATGGCAATAGGATAAAAACGGGTTACTAAGA
Dog             CAATGGCAATAGGATAAAAACGGGTTACTAAGA
Chicken        CAATGGCAATAGGATAAAAACGGGTTACTAAGA
```

3

4

5 **Supplemental Figure 2.**

6

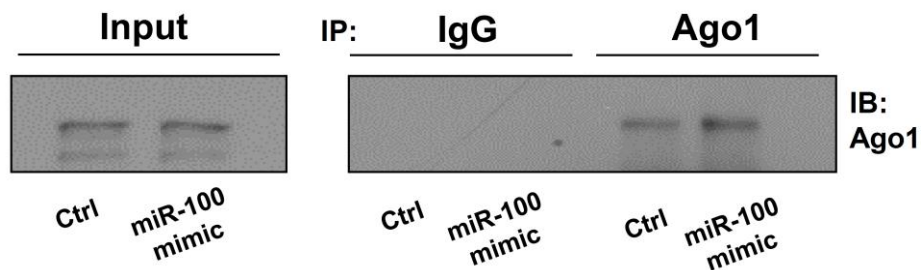

7

8

9 **Supplemental Figure legend:**

10

11 **Figure. S1** Comparison of the seed region of miR-100 with putative target sequences of the 3'  
12 UTR conserved regions at Human, Chimpanzee, Mouse, Rat, Dog and Chicken VLDLR mRNA.

13

14 **Figure. S2** Western blot analyzing the Ago1 immunocomplexes after 48 hours of miR-100 mimic  
15 or control RNA transfection in input of cell lysate as well as IgG and Ago1 pulled down sample.  
16 Data are representative of 3 independent experiments.

17
